# Supplementary material for: Conducting polymer and metal–complex composites formed by complexation of the ligands from the vapour phase
Source: Royal Society of Chemistry journal article supplement (doi:10.1039/c6ra05463c), 2016-01-01
Supplement: c6ra05463c1.pdf [file c6ra05463c1.pdf]

## Electronic Supplementary Information for

### Conducting polymer and metal-complex composites formed by complexation of the ligands from the vapour phase

David Mayevsky,<sup>a</sup> Orawan Winther-Jensen<sup>a</sup> and Bjorn Winther-Jensen<sup>a\*</sup>

<sup>a</sup> Department of Materials Engineering, Monash University, Clayton, Australia. Fax: 61 3 9905 4940; Tel: 61 3 9905 5343; E-mail: bjorn.winther-jensen@monash.edu

#### Materials

40% Iron(III) para-toluenesulphonate(Fe(III)PTS) in butanol and 3,4-ethylenedioxythiophene were purchased from Yacoo Chemicals Co.,Ltd. Pyridine was obtained from BDH Chemicals. Bipyridine (BIPY) was purchased from Sigma Aldrich. Benzotriazole (BTZ) and 8-Hydroxyquinoline (8HQ) were purchased from Sigma Aldrich. Sodium dihydrogen phosphate monohydrate was purchased from Merck. All chemicals were used as received.

#### Cyclic voltammetry

Cyclic voltammograms (CVs) of the composites before and after nitrite addition are shown in Fig. S1 and S2.

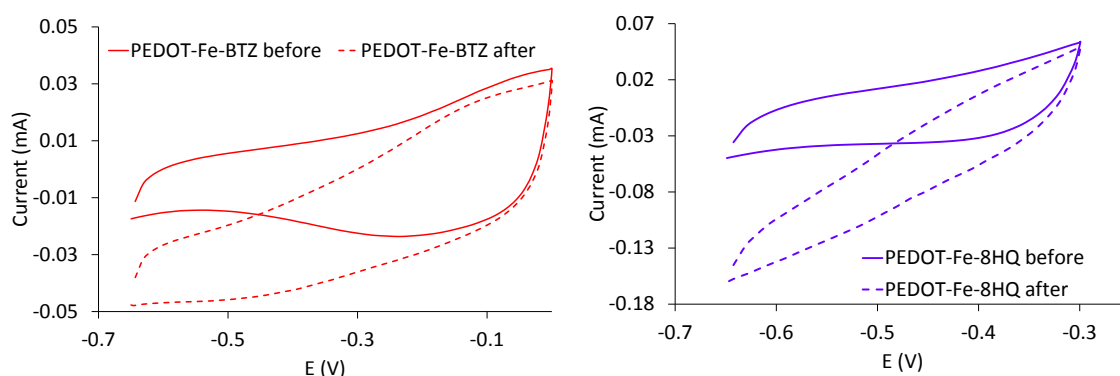

**Fig. S1** CVs of PEDOT-Fe-BTZ and PEDOT-Fe-8HQ composites in 0.1 M NaH<sub>2</sub>PO<sub>4</sub> pH 4.4.

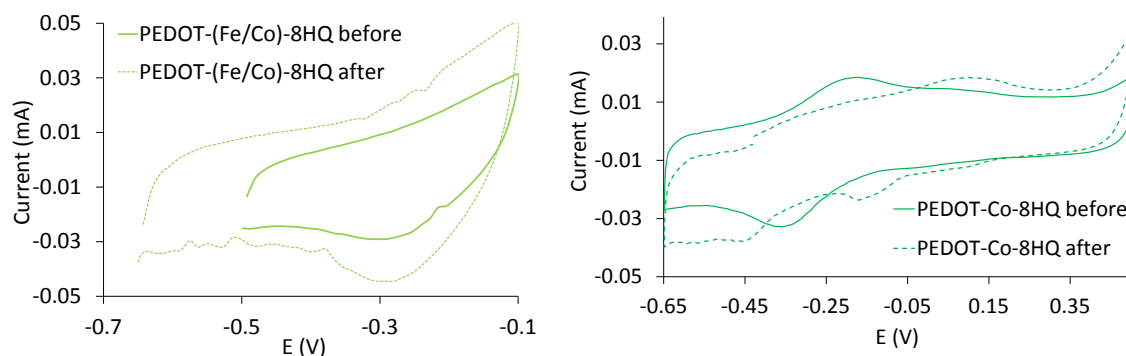

**Fig. S2** CVs of PEDOT-(Fe/Co)-8HQ (left) and PEDOT-Co-8HQ (right) composites in 0.1 M NaH<sub>2</sub>PO<sub>4</sub> pH 4.4.

### SEM/EDX results of PEDOT-(Fe/Co)-8HQ

The samples were coated with thin layer of gold and SEM images were obtained using a FEI Nova NanoSEM 450 Field Emission Gun Scanning Electron Microscope. Energy-dispersive X-ray analysis (EDX) was performed at 15 kV for elemental analysis.

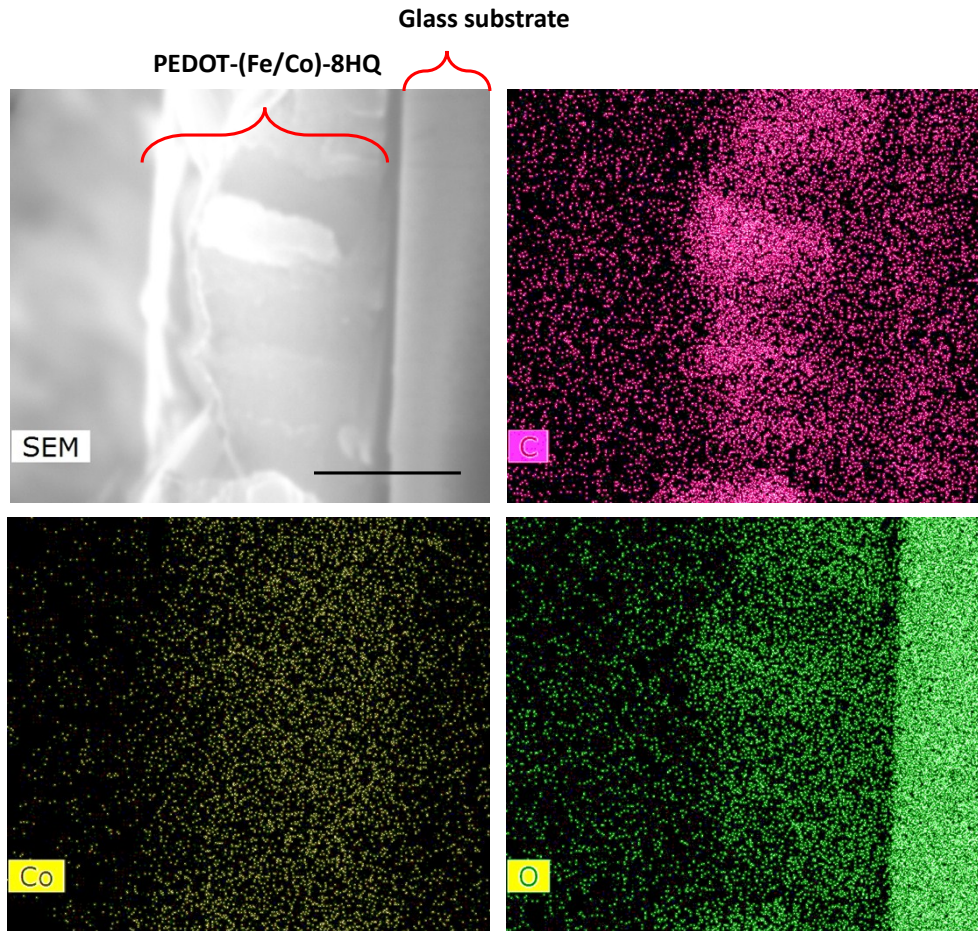

**Fig. S3** A cross sectional SEM image and elemental maps showing C, O and Co distribution inside PEDOT-(Fe/Co)-8HQ film. Scale bar is 1  $\mu\text{m}$ .
